# Supplementary material for: Synergy of Fe dopants and oxygen vacancies confined in atomically-thin cobaltous oxide sheets for high-efficiency CO2 photoreduction
Source: Royal Society of Chemistry journal article supplement (doi:10.1039/d1ta06645e), 2021-01-01
Supplement: d1ta06645e1.pdf [file d1ta06645e1.pdf]

## Supplementary Information

### Synergy of Fe dopants and oxygen vacancies confined in atomically-thin cobaltous oxide sheets for high-efficiency CO<sub>2</sub> photoreduction

Kui Chen<sup>a,b,#</sup>, Sheng Zhou<sup>a,#</sup>, Tongtong Jiang<sup>a,\*</sup>, Xiaodong Li<sup>b</sup>, Jing Yu<sup>b</sup>, Qiuyan Wang<sup>b</sup>, Xiaoliang Xu<sup>b,\*</sup> and Lixin Zhu<sup>c,\*</sup>

<sup>a</sup> Information Materials and Intelligent Sensing Laboratory of Anhui Province, Anhui University, 230601 Hefei, China;

<sup>b</sup> Key Laboratory of Strongly-Coupled Quantum Matter Physics, Chinese Academy of Sciences, School of Physical Sciences, University of Science and Technology of China, Hefei Anhui 230026, P.R. China;

<sup>c</sup> Department of General Surgery & Central Laboratory, the First Affiliated Hospital of Anhui Medical University, Hefei Anhui 230022, P.R. China.

### Experimental Section

**Chemicals:** C<sub>15</sub>H<sub>21</sub>FeO<sub>6</sub> (Iron(III) acetylacetonate, 98%), C<sub>15</sub>H<sub>21</sub>CoO<sub>6</sub> (Cobalt acetylacetonate, 98%) were purchased from Aladdin Reagent (Shanghai) Co., Ltd; CTAB (Hexadecyl trimethyl ammonium bromide, AR), C<sub>2</sub>H<sub>6</sub>O<sub>2</sub> (Ethylene glycol, AR), and C<sub>2</sub>H<sub>6</sub>O (ethanol, AR) were provided from Shanghai Chemical Reagent Factory. Above reagents were without further purification. Millipore water of resistivity of 18.2 MΩ·cm was used in the whole experimental process.

**Synthesis of Fe-Co based nanosheets precursors:** Fe-Co based nanosheets were synthesized by hydrothermal and annealing treatment. First, 600 mg C<sub>15</sub>H<sub>21</sub>CoO<sub>6</sub> was dispersed in the solution with 60 mL C<sub>2</sub>H<sub>6</sub>O<sub>2</sub> and 11 mL H<sub>2</sub>O containing 2.2 g CTAB. Then, 30 mg C<sub>15</sub>H<sub>21</sub>FeO<sub>6</sub> was added to above homogeneous solution under stirring, followed by transferring the solution into the polytetrafluoroethylene (PTFE) lining and disposing under 180 °C for 48 h. Fe-Co based nanosheets precursors were obtained by collecting, washing and drying. Co based nanosheets precursors were prepared in the same way except that no C<sub>15</sub>H<sub>21</sub>FeO<sub>6</sub> was added.

**Synthesis of Fe-Co based single-unit-cell layers:** Fe-Co based nanosheets precursors were placed in a quartz box under the annealing environment of 50 Pa pressure. Next, the precursors were heated up to 350 °C with 10 °C s<sup>-1</sup> heating rate, and holded for 5 min, then took out the sample immediately when time was up. The obtained samples were referred as V<sub>o</sub>-Fe-CoO single-unit-cell layers. And Fe-CoO single-unit-cell layers were prepared in similar experimental procedures under 100 Pa and with 2.5 L min<sup>-1</sup> of air flow rate for annealing. V<sub>o</sub>-CoO and CoO single-unit-cell layers were obtained with the same rapid annealing procedure using Co based nanosheets precursors.

By heat treatment at high temperature in a certain atmosphere can introduces oxygen vacancies. According to interequilibrium principle of the oxygen at the contact interface of two phases and standard Kröger-Vink notation, the formation of oxygen vacancies at high temperatures follows the following equilibrium:

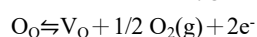

The equilibrium constant K for this reaction can be expressed as

$$K = [\text{V}_\text{O}]n^2 p(\text{O}_2)^{-1/2}$$

The above equation can be transformed into

$$[\text{V}_\text{O}] = Kn^{-2} p(\text{O}_2)^{-1/2}$$

Where O<sub>o</sub> represent the lattice oxygen, V<sub>o</sub> is oxygen vacancy. [V<sub>o</sub>] denotes the concentration of oxygen vacancies,

$n$  denotes the concentration of electrons,  $p(\text{O}_2)$  is oxygen pressure. Oxygen vacancy concentration decreases with increasing oxygen partial pressure. Therefore, high temperature heat treatment under hypoxic conditions is beneficial to the formation of oxygen vacancy. Therefore, under vacuum condition, the sample with abundant oxygen vacancies were obtained, but under Air condition of 100 Pa, the increasement of oxygen pressure induce the reduction of oxygen vacancies.<sup>1,2</sup>

## Materials characterization

The morphology and corresponding element analysis of samples were explored by a JEOL JEM-ARM200F TEM/STEM with a spherical aberration corrector. XRD patterns were recorded using an X-ray diffractometer (XRD Bruker D8-ADVANCE) with Cu K $\alpha$  radiation ( $\lambda=0.15406$  nm). AFM measurements were conducted using an Atomic Force Microscopy (AFM5500M). The surface information of elemental was characterized by X-ray photoelectron spectroscopy (XPS, ESCALAB 250Xi). Various reaction intermediates in the CO<sub>2</sub> reduction process were measured using In-situ Fourier-transform infrared spectroscopy (FTIR, Thermo Scientific Nicolet iS50 Set-up).

*Photocatalytic CO<sub>2</sub> reduction measurements:* The photocatalytic reduction CO<sub>2</sub> measurement were carried out in the all-glass automatic online trace gas analysis system (Beijing China PerfectLight, Labsolar -6A). In the CO<sub>2</sub> photocatalytic process, the 18 mg sample is evenly dispersed on a quartz disc with a radius of 3cm, then the quartz plate and 10 mL deionized water were sealed in the 560 ml quartz reactor. After the quartz reactor was connected to Labsolar -6A, the reaction system was vacuumed and scrubbed by CO<sub>2</sub>. Next, the system is kept at 80 Pa CO<sub>2</sub> pressure for 1h to stabilize, then turn on the light for CO<sub>2</sub> reduction test. Light irradiation was provided by a MC-XF300 Xe lamp (Beijing MerryChange Technology CO., LTD.) with a standard AM 1.5G filter for simulating visible light, with an output light density of  $\sim 950$  mW cm<sup>-2</sup>, and the system had been working at a temperature of 298 $\pm$ 0.2 K. The products of the CO<sub>2</sub> reduction process were periodically detected by analyzing chromatographic peaks from the gas chromatography (Techcomp GC7900 gas chromatograph, FID detector, TDX-01 column)

*Photoelectrochemical measurements:* Related electrochemical tests were completed with the CHI760E electrochemical workstation (CH Instruments Ins). 0.5 M Na<sub>2</sub>SO<sub>4</sub> solution was used for the photocurrent density spectra and Mott-Schottky measurements. The mixed solution containing 0.1 M K<sub>3</sub>[Fe(CN)<sub>6</sub>], 0.1 M K<sub>4</sub>Fe(CN)<sub>6</sub> and 0.1 M KCl was used in EIS measurements. The measurement was conducted with a conventional three electrodes cell using the Pt as the counter electrode, saturated calomel electrode as the reference electrode, and a 2.2 cm $\times$ 2.2 cm FTO coated with 4 mg sample and 15  $\mu$ L Nafion as working electrodes.

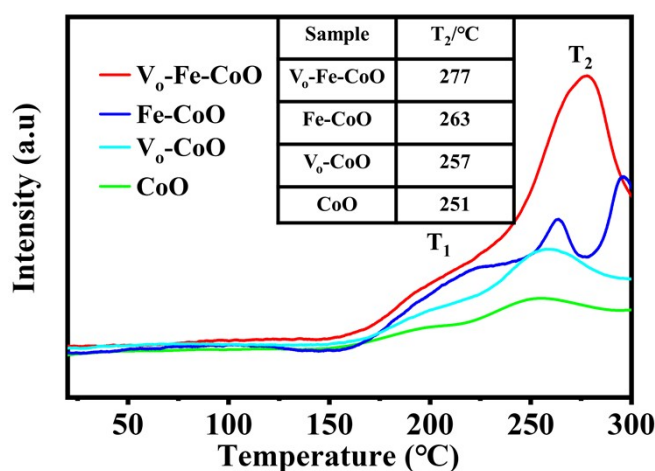

**Fig. S1** CO<sub>2</sub> temperature-programmed desorption (CO<sub>2</sub>-TPD) of V<sub>0</sub>-Fe-CoO, Fe-CoO, V<sub>0</sub>-CoO and CoO single-unit-cell layers.

CO<sub>2</sub> temperature-programmed desorption (CO<sub>2</sub>-TPD) was conducted to explore CO<sub>2</sub> adsorption properties of samples. In Fig. S1, the weak desorption peaks around 180 °C (T<sub>1</sub>) correspond with the weak adsorption for CO<sub>2</sub> related to the surface hydroxyl group.<sup>3</sup> In addition, the desorption temperature of CO<sub>2</sub> from the metal sites (T<sub>2</sub> in Fig. S1) ranges from 150°C to 280 °C,<sup>24</sup> and the desorption temperature of CO<sub>2</sub> from samples increased order CoO < V<sub>o</sub>-CoO < Fe-CoO < V<sub>o</sub>-Fe-CoO. The shift to higher temperature of T<sub>2</sub> demonstrates the increase in the strength of basic sites corresponding stronger CO<sub>2</sub> activation ability.<sup>5,6</sup> These results are consistent with CO<sub>2</sub> absorption energy barriers of samples displayed in Fig. 5f.

## First-principles Calculations

All the calculations were carried out by using Vienna Ab initio Simulation Package (VASP) based on density functional theory (DFT) using projector augmented wave (PAW) potentials. The exchange-correlation between electrons was treated using the generalized gradient approximation (GGA) of Perdew-Becke-Ernzerhof (PBE).<sup>5,6</sup> To achieve the accuracy of the calculated results, the plane wave cutoff energy was set to 480 eV. A Monkhorst-Pack 3×3×1 k-point grid was used to sample the Brillouin zone. All structures were optimized under the conventional energy (10<sup>-4</sup> eV) and force (0.02 eV/Å) convergence criteria.

Gibbs free energies for the adsorbed intermediates were calculated at 298.15 K according to the following equation:

$$G = E_{\text{DFT}} + E_{\text{ZPE}} - T\Delta S \quad (\text{S1})$$

$E_{\text{DFT}}$  is the electronic energy calculated with VASP.  $E_{\text{ZPE}}$ , and  $T\Delta S$  are the free energy from zero-point vibration energy, and entropy, respectively.

In this paper, the obtained free energy changes were presented as following:

$$G [\text{H}^+ + \text{e}^-] = 0.5 \times G [\text{H}_2] - eU \quad (\text{S2})$$

$$\Delta G [\text{*COOH}] = G [\text{*COOH}] + 7 \times G [\text{H}^+ + \text{e}^-] - (G [\text{*}] + G [\text{CO}_2] + 8 G [\text{H}^+ + \text{e}^-]) \quad (\text{S3})$$

$$\Delta G [\text{*CO}] = G [\text{*CO}] + G [\text{H}_2\text{O}] + 6 \times G [\text{H}^+ + \text{e}^-] - (G [\text{*}] + G [\text{CO}_2] + 8 G [\text{H}^+ + \text{e}^-]) \quad (\text{S4})$$

$$\Delta G [\text{*+CO}] = G [\text{*}] + G [\text{CO}] + G [\text{H}_2\text{O}] + 6 \times G [\text{H}^+ + \text{e}^-] - (G [\text{*}] + G [\text{CO}_2] + 8 G [\text{H}^+ + \text{e}^-]) \quad (\text{S5})$$

$$\Delta G [\text{*CHO}] = G [\text{*CHO}] + G [\text{H}_2\text{O}] + 5 \times G [\text{H}^+ + \text{e}^-] - (G [\text{*}] + G [\text{CO}_2] + 8 G [\text{H}^+ + \text{e}^-]) \quad (\text{S6})$$

$$\Delta G [\text{*CH}_2\text{O}] = G [\text{*CH}_2\text{O}] + G [\text{H}_2\text{O}] + 4 \times G [\text{H}^+ + \text{e}^-] - (G [\text{*}] + G [\text{CO}_2] + 8 G [\text{H}^+ + \text{e}^-]) \quad (\text{S7})$$

$$\Delta G [\text{*CH}_3\text{O}] = G [\text{*CH}_3\text{O}] + G [\text{H}_2\text{O}] + 3 \times G [\text{H}^+ + \text{e}^-] - (G [\text{*}] + G [\text{CO}_2] + 8 G [\text{H}^+ + \text{e}^-]) \quad (\text{S8})$$

$$\Delta G [\text{*CH}_3\text{OH}] = G [\text{*CH}_3\text{OH}] + G [\text{H}_2\text{O}] + 2 \times G [\text{H}^+ + \text{e}^-] - (G [\text{*}] + G [\text{CO}_2] + 8 G [\text{H}^+ + \text{e}^-]) \quad (\text{S9})$$

$$\Delta G [\text{*CH}_3] = G [\text{*CH}_3] + 2 \times G [\text{H}_2\text{O}] + G [\text{H}^+ + \text{e}^-] - (G [\text{*}] + G [\text{CO}_2] + 8 G [\text{H}^+ + \text{e}^-]) \quad (\text{S10})$$

$$\Delta G [\text{*+CH}_4] = G [\text{*}] + G [\text{CH}_4] + 2 \times G [\text{H}_2\text{O}] - (G [\text{*}] + G [\text{CO}_2] + 8 G [\text{H}^+ + \text{e}^-]) \quad (\text{S11})$$

Where \* is the substrate, U is the applied overpotential and e is the elementary charge. In this study, U=0V versus reversible hydrogen electrode is adopted.

The adsorption energy of CO<sub>2</sub> and the desorption energy of CO and CH<sub>4</sub> on the stoichiometric were calculated by the following equation:

$$E_{\text{ads}} = E_{\text{CO}_2^*} - E_{\text{CO}_2} - E^* \quad (\text{S12})$$

$$E_{\text{des1}} = E_{\text{CO}} + E^* - E_{\text{CO}^*} \quad (\text{S13})$$

$$E_{\text{des2}} = E_{\text{CH}_4} + E^* - E_{\text{CH}_4^*} \quad (\text{S14})$$

$E_{\text{CO}_2^*}$ ,  $E_{\text{CO}^*}$  and  $E_{\text{CH}_4^*}$  is the total energy of sample absorbed with CO<sub>2</sub>, CO and CH<sub>4</sub>.  $E_{\text{CO}_2}$  is the total energy of the optimized gas phase CO<sub>2</sub> molecule,  $E^*$  is the total energy of sample.

Band-gap energy ( $E_g$ ) can be obtained by using UV-vis absorption spectra according to the formula

$$\alpha h\nu = A(h\nu - E_g)^{n/2} \quad (\text{S15})$$

Where  $\alpha$  is the absorption coefficient of material.  $h$  and  $\nu$  represent the Planck constant and frequency of the incident light, respectively.  $A$  is designated as a proportionality constant.

## Calculation details

**Table S1.** Free energy (eV) for different samples in different states

|                        | Vo-Fe-CoO | Fe-CoO   | Vo-CoO   | CoO      |
|------------------------|-----------|----------|----------|----------|
| G[*]                   | -232.964  | -241.000 | -232.128 | -236.976 |
| G[*COOH]               | -260.442  | -268.132 | -258.741 | -261.714 |
| G[*CO]                 | -249.785  | -257.508 | -247.703 | -251.707 |
| G[*CHO]                | -252.494  | -260.301 | -250.565 | -254.481 |
| G[*CH <sub>2</sub> O]  | -256.645  | -264.877 | -253.226 | -258.643 |
| G[*CH <sub>3</sub> O]  | -261.106  | -267.553 | -259.177 | -266.547 |
| G[*CH <sub>3</sub> OH] | -263.499  | -271.838 | -261.689 | -266.547 |
| G[*CH <sub>3</sub> ]   | -253.541  | -260.726 | -251.733 | -255.393 |
| G[*CH <sub>4</sub> ]   | -257.104  | -266.108 | -256.291 | -261.628 |
| G[*CO <sub>2</sub> ]   | -256.902  | -265.964 | -254.952 | -259.089 |

**Table S2.** Free energy (eV) for other species

| Species | H <sub>2</sub> | H <sub>2</sub> O | CO <sub>2</sub> | CO     | CH <sub>4</sub> |
|---------|----------------|------------------|-----------------|--------|-----------------|
| G (eV)  | -6.89          | -14.32           | -23.33          | -15.26 | -23.44          |

**Table S3.** Free energy (eV) of CO<sub>2</sub> photoreduction for different samples

|                                  | Vo-Fe-CoO | Fe-CoO | Vo-CoO | CoO    |
|----------------------------------|-----------|--------|--------|--------|
| $\Delta G$ [*+CO <sub>2</sub> ]  | 0         | 0      | 0      | 0      |
| $\Delta G$ [*COOH]               | -0.699    | -0.351 | 0.167  | 2.043  |
| $\Delta G$ [*CO]                 | -0.911    | -1.304 | 0.335  | 1.179  |
| $\Delta G$ [*CH*]                | -0.171    | 0.060  | 0.923  | 1.823  |
| $\Delta G$ [*CH <sub>2</sub> O]  | -0.872    | -1.067 | 1.712  | 1.144  |
| $\Delta G$ [*CH <sub>3</sub> O]  | -1.882    | -0.293 | -0.789 | 0.371  |
| $\Delta G$ [*CH <sub>3</sub> OH] | -0.825    | -1.127 | 0.149  | 0.140  |
| $\Delta G$ [*CH <sub>3</sub> ]   | -1.737    | -0.886 | -0.765 | 0.423  |
| $\Delta G$ [*CO <sub>2</sub> ]   | -0.609    | -1.634 | 0.505  | 1.217  |
| $\Delta G$ [CO]                  | -1.56     | -1.248 | -0.414 | 0.529  |
| $\Delta G$ [CH <sub>4</sub> ]    | -0.700    | -1.667 | -0.723 | -1.211 |

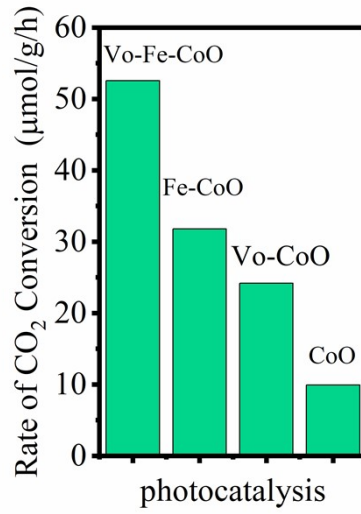

**Fig. S2** Rate of CO<sub>2</sub> conversion for V<sub>0</sub>-Fe-CoO, Fe-CoO, V<sub>0</sub>-CoO and CoO single-unit-cell layers.

The oxygen evolution is estimated according to the principle of conservation of charge and the calculation method is as follows.

In Fig.6, the results of SVUV-PIMS identify that there are five kinds of gases (CO<sub>2</sub>, CO, CH<sub>4</sub>, O<sub>2</sub> and H<sub>2</sub>O vapor) exist in the closed reactor. The reduction products are CO and CH<sub>4</sub>, the O<sub>2</sub> is the oxidation product. Additionally, the reduction of CO<sub>2</sub> to CH<sub>4</sub> requires eight electrons, and reduction to CO needs two electrons. And the generation of O<sub>2</sub> corresponds to the four-electron process.<sup>9</sup> Consequently, the following reaction formula can be deduced.

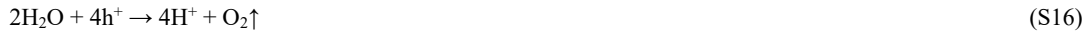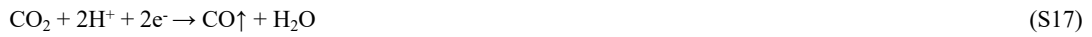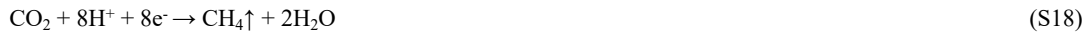

$$n(\text{O}_2) = 0.5*n(\text{CO}) + 2*n(\text{CH}_4) \quad (\text{S19})$$

The rate of Gas (CO, CH<sub>4</sub> and O<sub>2</sub>) production and the time-resolved O<sub>2</sub> production for V<sub>0</sub>-Fe-CoO, Fe-CoO, V<sub>0</sub>-CoO and CoO single-unit-cell layers are shown in Fig.S3 and Fig.S4.

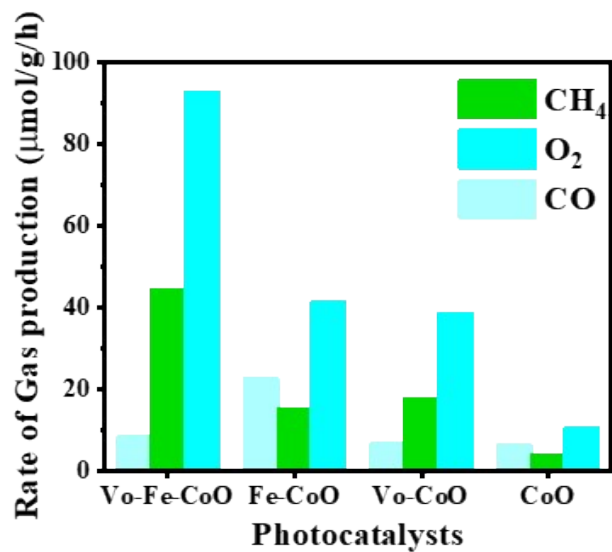

Fig. S3 Rate of gas production for V<sub>o</sub>-Fe-CoO, Fe-CoO, V<sub>o</sub>-CoO and CoO single-unit-cell layers.

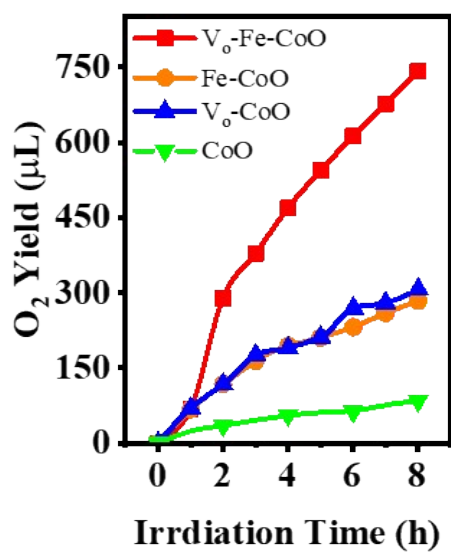

Fig. S4 Time-resolved O<sub>2</sub> production for V<sub>o</sub>-Fe-CoO, Fe-CoO, V<sub>o</sub>-CoO and CoO single-unit-cell layers.

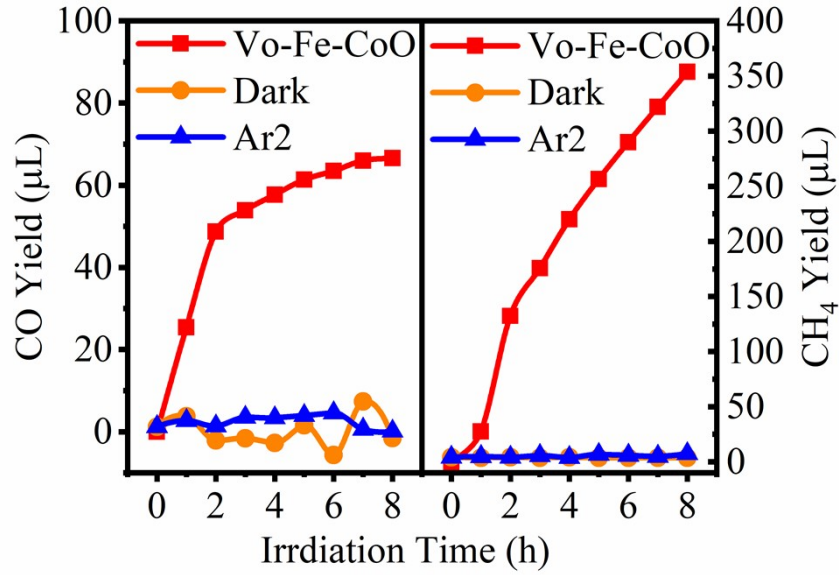

**Fig. S5** Time-resolved CO (left) and CH<sub>4</sub> (right) productions for Vo-Fe-CoO under light radiation and CO<sub>2</sub> atmosphere, under dark and CO<sub>2</sub> atmosphere, under light radiation and Ar<sub>2</sub> atmosphere, respectively.

**Table S4.** Proportion of CH<sub>4</sub> in CO<sub>2</sub> reduction products

| Samples | Vo-Fe-CoO | Fe-CoO  | Vo-CoO  | CoO     |
|---------|-----------|---------|---------|---------|
| η (%)   | 91.40 %   | 57.02 % | 84.00 % | 54.95 % |

$$\eta (\%) = R(\text{CH}_4) / [R(\text{CH}_4) + R(\text{CO})] \times 100 \% \quad (\text{S20})$$

Where  $R(\text{CH}_4)$ ,  $R(\text{CO})$  denote the rate of methane and carbon monoxide evolution in the photocatalysis.

**Table S5.** Quantum efficiency of CO<sub>2</sub> reduction products

| Samples   | N (μmol) | QY (%) |
|-----------|----------|--------|
| Vo-Fe-CoO | 370.40   | 0.38   |
| Fe-CoO    | 164.59   | 0.17   |
| Vo-CoO    | 153.42   | 0.16   |
| CoO       | 42.41    | 0.05   |

The quantum efficiency is defined by the ratio of the effective electrons used for CO<sub>2</sub> reduction to the total input

$$\text{QY} (\%) = \text{Number of reacted electrons} / \text{number of incident photons} \times 100\% \quad (\text{S21})$$

$$n = (2 \times \text{the number of CO}) + (8 \times \text{the number of CH}_4) \text{ molecules} \quad (\text{S22})$$

$$\text{Number of reacted electrons} = n \times N_A \quad (\text{S23})$$

$$\text{Number of incident photons} = \text{Light absorbed by the photocatalyst} / \text{photon energy} \quad (\text{S24})$$

$$\text{Light absorbed by the photocatalyst} = W \times A \times t \quad (\text{S25})$$

$$\text{Photon energy} = h \times c / \lambda \quad (\text{S26})$$

$$\text{QY} (\%) = n \times N_A \times h \times c / (W \times A \times \lambda \times t) \quad (\text{S27})$$

photon flux. The reduction of CO<sub>2</sub> molecules to CH<sub>4</sub> molecule requires eight electrons:

Where  $N_A$  is Avogadro's number ( $6.022 \times 10^{23} \text{ mol}^{-1}$ ).  $h$  is Planck's constant ( $h = 6.63 \times 10^{-34} \text{ J}\cdot\text{s}$ ).  $c$  is the speed of light ( $3 \times 10^{17} \text{ nm s}^{-1}$ ).  $t$  is irradiation time.  $W$  is simulated solar irradiation ( $230 \text{ mW cm}^{-2}$ ).  $A$  is the geometric

irradiation area of the photocatalyst on the quartz fiber plate placed inside the reactor (28.26 cm<sup>2</sup>).

**Table S6.** The position of CB and VB for samples (NHE, pH = 7).

| Sample | V <sub>o</sub> -Fe-CoO | Fe-CoO   | V <sub>o</sub> -CoO | CoO      |
|--------|------------------------|----------|---------------------|----------|
| CB     | -0.59 eV               | -0.64 eV | -0.67 eV            | -0.68 eV |
| Eg     | 1.37 eV                | 1.46 eV  | 1.48 eV             | 1.51 eV  |
| VB     | 0.78 eV                | 0.82 eV  | 0.81 eV             | 0.83 eV  |

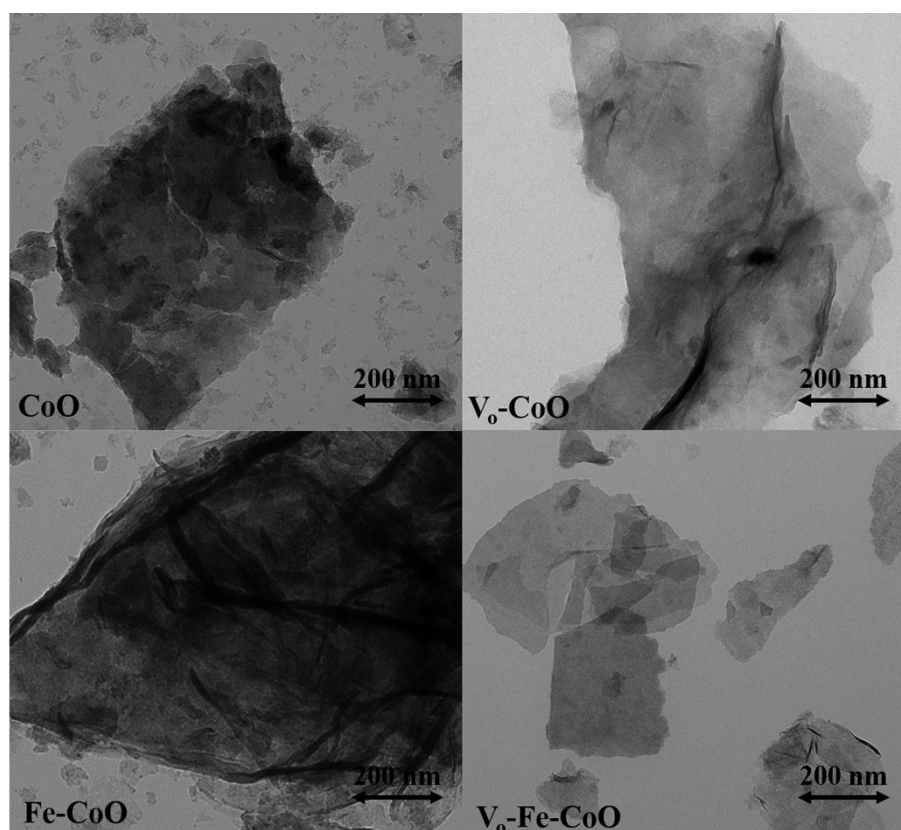

**Fig. S6** TEM images of V<sub>o</sub>-Fe-CoO, Fe-CoO, V<sub>o</sub>-CoO and CoO single-unit-cell layers.



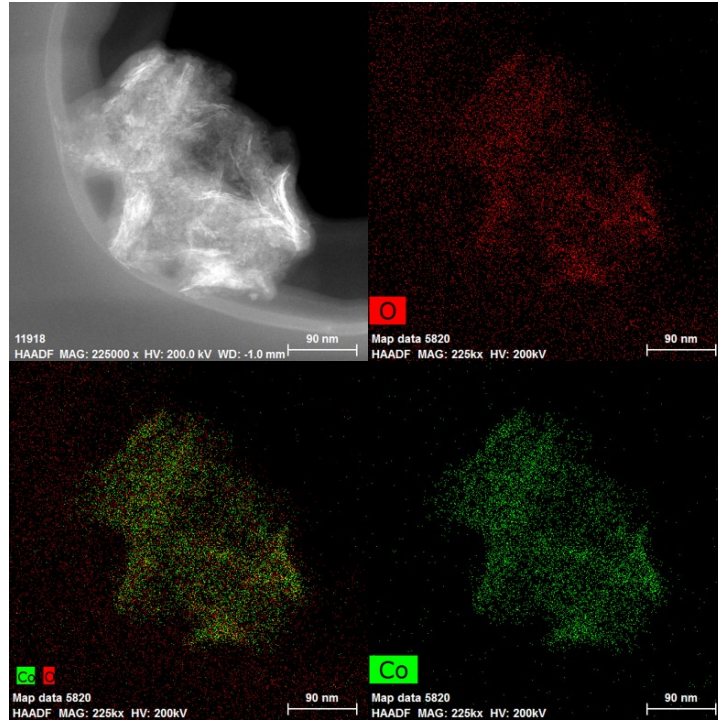

Fig. S7 HAADF-STEM and EELS mapping of CoO single-unit-cell layers.

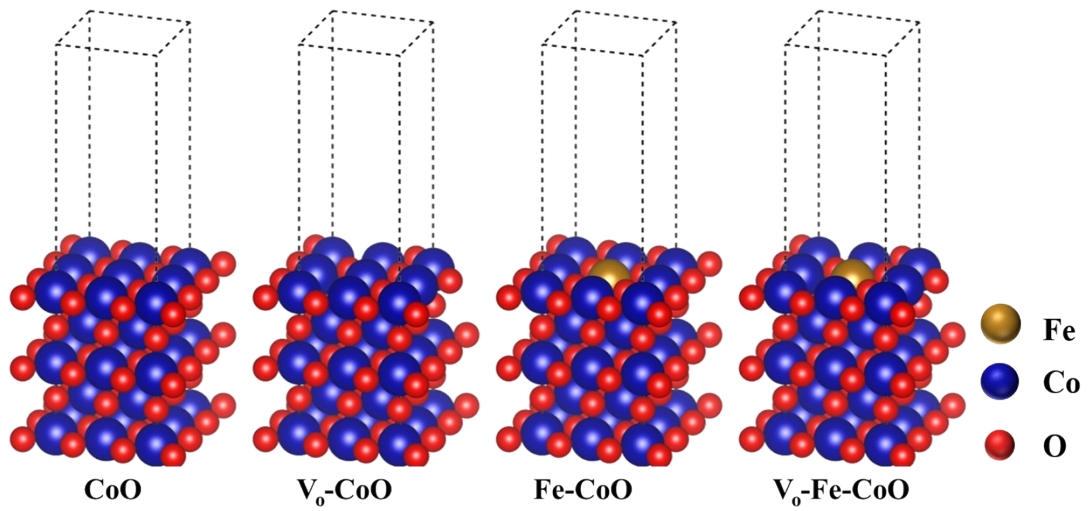

Fig. S8 Structural models of  $V_o$ -Fe-CoO, Fe-CoO,  $V_o$ -CoO and CoO single-unit-cell layers.

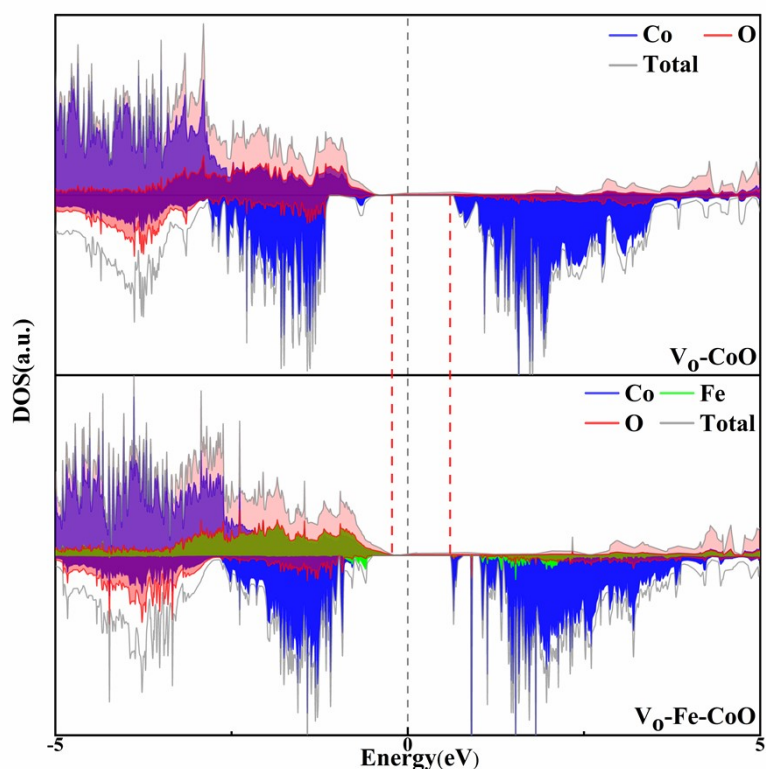

Fig. S9 Density of states (DOS) of  $V_0$ -Fe-CoO and  $V_0$ -CoO single-unit-cell layers.

1. X. Y. Pan, M. Q. Yang, X. Z. Fu, N. Zhang and Y. J. Xu, Defective  $TiO_2$  with oxygen vacancies: synthesis, properties and photocatalytic applications, *Nanoscale* **2013**, 5, 3601-3614.
2. L. Iglesias, A. Sarantopoulos, C. Magen and F. Rivadulla, Oxygen vacancies in strained  $SrTiO_3$  thin films: Formation enthalpy and manipulation, *Phys Rev B*, **2017**, 95, 1-7.
3. X. Guo, C. Zhong, D. Mao, W. Song, L. U and G. Hong, *RSC Adv.* **2015**, 5, 52958-52965.
4. W. Li, G. Zhang, X. Jiang, Y. Liu, J. Zhu, F. Ding, Z. Liu, X. Guo and C. Song, *ACS Cat.* **2019**, 9, 2739-2751.
5. Y. B. Shi, G. M. Zhan, H. Li, X. B. Wang, X. F. Liu, L. J. Shi, K. Wei, C. C. Ling, Z. L. Li, H. Wang, C. L. Mao, X. Liu and L. Z. Zhang, *Adv Mater* **2021**, 0935-9648
6. L. Jiang, K. Wang, X. Wu and G. Zhang, *Solar RRL* **2020**, 5, 2000326.
7. P. E. Blochl, *Phys. Rev. B*, **1994**, 50, 17953.
8. J. P. Perdew, K. Burke, M. Ernzerhof, *Phys. Rev. Lett.*, **1996**, 77, 3865.
9. X. D. Li, Y. F. Sun, J. Q. Xu, Y. J. Shao, J. Wu, X. L. Xu, Y. Pan, H. X. Ju, J. F. Zhu and Y. Xie, *Nat. Energy*, **2019**, 4(8).
